# Supplementary material for: Structure–Function Insights into the Fungal Endo-Chitinase Chit33 Depict its Mechanism on Chitinous Material
Source: MDPI journal article supplement (doi:10.3390/ijms23147599), 2022-07-09
Supplement: s1 [file s1]

## ***Supplementary Materials***

### **Structural and biochemical analysis of the fungal endo-chitinase Chit33 depicts its mechanism on chitinous material**

Elena Jiménez-Ortega<sup>a^</sup>, Peter Elias Kidibule<sup>b^</sup>, María Fernández-Lobato<sup>b\*</sup> and Julia Sanz-Aparicio<sup>a\*</sup>

<sup>a</sup> Department of Crystallography and Structural Biology. Institute of Physical-Chemistry Rocasolano. CSIC. 28006 Madrid. Spain

<sup>b</sup> Department of Molecular Biology. Centre of Molecular Biology Severo Ochoa. CSIC-UAM. 28049 Madrid. Spain

|                  |                                                                                                                      |
|------------------|----------------------------------------------------------------------------------------------------------------------|
| <b>Table S1</b>  | Crystallographic statistics                                                                                          |
| <b>Table S2</b>  | Specific activity on the referred chitosan types                                                                     |
| <b>Table S3</b>  | Peak areas of the NAG series detected by MS in reactions mediated with the Chit33 variants and NAG6                  |
| <b>Table S4</b>  | Peak areas of the NAG series detected by MS in reaction mediated by the Chit33 variants and NAG6 after 24h reactions |
| <b>Table S5</b>  | Primers used for site-directed mutagenesis                                                                           |
| <b>Figure S1</b> | Michaelis-Menten kinetics for the Chit33 variants on colloidal chitin and NAG6                                       |

**TABLE S1.** Crystallographic statistics (values in parentheses are for the high-resolution shell).

| Crystal data                                 | Chit33                                         | Chit33 D165A/E167A - NAG4                      |
|----------------------------------------------|------------------------------------------------|------------------------------------------------|
| Space group                                  | P 2 <sub>1</sub> 2 <sub>1</sub> 2 <sub>1</sub> | P 2 <sub>1</sub> 2 <sub>1</sub> 2 <sub>1</sub> |
| Unit cell parameters                         |                                                |                                                |
| a (Å)                                        | 65.61                                          | 65.42                                          |
| b (Å)                                        | 66.91                                          | 66.78                                          |
| c (Å)                                        | 75.32                                          | 76.44                                          |
| <b>Data collection</b>                       |                                                |                                                |
| Beamline                                     | ALBA<br>XALOC                                  | ALBA<br>XALOC                                  |
| Temperature (K)                              | 100                                            | 100                                            |
| Wavelength (Å)                               | 0.979190                                       | 0.979180                                       |
| Resolution (Å)                               | 46.85-1.12<br>(1.14-1.12)                      | 46.73- 1.60<br>(1.63-1.60)                     |
| <b>Data processing</b>                       |                                                |                                                |
| Total reflections                            | 809980 (38863)                                 | 297035 (14842)                                 |
| Unique reflections                           | 127452 (6255)                                  | 44920 (2190)                                   |
| Multiplicity                                 | 6.4 (6.2)                                      | 6.6 (6.8)                                      |
| Completeness (%)                             | 99.8 (99.9)                                    | 100.0 (100.0)                                  |
| Mean I/σ (I)                                 | 20.9 (2.6)                                     | 12.8 (3.1)                                     |
| $R_{merge}^+$ (%)                            | 3.7 (69.8)                                     | 8.3 (62.3)                                     |
| $R_{pim}^{++}$ (%)                           | 1.6 (30.5)                                     | 3.5 (25.5)                                     |
| Molecules per ASU                            | 1                                              | 1                                              |
| <b>Refinement</b>                            |                                                |                                                |
| $R_{work} / R_{free}^{+++}$ (%)              | 14.97/16.04                                    | 14.47/16.84                                    |
| <b>Nº of atoms/average B (Å<sup>2</sup>)</b> |                                                |                                                |
| Protein                                      | 2390/16.48                                     | 2350/17.82                                     |
| Ligands                                      | 27/29.28                                       | 57/39.70                                       |
| Water Molecules                              | 371/32.45                                      | 302/34.40                                      |
| All atoms                                    | 2788/18.73                                     | 2709/20.13                                     |
| <b>Ramachandran plot (%)</b>                 |                                                |                                                |
| Favoured                                     | 99                                             | 99                                             |
| Outliers                                     | 0                                              | 0                                              |
| <b>RMS deviations</b>                        |                                                |                                                |
| Bonds (Å)                                    | 0.0088                                         | 0.0090                                         |
| Angles (°)                                   | 1.4664                                         | 1.4984                                         |
| <b>PDB accession codes</b>                   | 7ZYA                                           | 7ZY9                                           |

<sup>+</sup> $R_{merge} = \sum_{hkl} \sum_i |I_i(hkl) - [I(hkl)]| / \sum_{hkl} \sum_i I_i(hkl)$ , where  $I_i(hkl)$  is the  $i$ th measurement of reflection  $hkl$  and  $[I(hkl)]$  is the weighted mean of all measurements.

<sup>++</sup> $R_{pim} = \sum_{hkl} [1/(N - 1)] 1/2 \sum_i |I_i(hkl) - [I(hkl)]| / \sum_{hkl} \sum_i I_i(hkl)$ , where  $N$  is the redundancy for the  $hkl$  reflection.

<sup>+++</sup> $R_{work} / R_{free} = \sum_{hkl} |F_o - F_c| / \sum_{hkl} |F_o|$ , where  $F_c$  is the calculated and  $F_o$  is the observed structure factor amplitude of reflection  $hkl$  for the working / free (5%) set, respectively.

**TABLE S2.** Specific activity on the referred chitosan types.

| Variant      | Colloidal chitin<br>(MW n.d.. DD ≤8) | CHIT50<br>(50-190 kDa.<br>DD 77%) | CHIT100<br>(100-300 kDa.<br>DD >90%) | CHIT600<br>(600-800 kDa;<br>DD >90%) |
|--------------|--------------------------------------|-----------------------------------|--------------------------------------|--------------------------------------|
| <b>Wt</b>    | 6.7 ±0.2                             | 19.5 ±0.3                         | 2.6 ±0.03                            | n.a.                                 |
| <b>S37D</b>  | 1.7 ±0.1                             | 10.0 ±0.3                         | 2.0 ±0.02                            | 0.3±0.001                            |
| <b>D117W</b> | 1.9 ±0.1                             | 5.1 ±0.1                          | 0.9 ±0.01                            | n.a.                                 |
| <b>S118Y</b> | 15.3 ±0.7                            | 94.4 ±4.1                         | 19.4 ±0.6                            | n.a.                                 |
| <b>Q199S</b> | 4.7 ±0.1                             | 9.6 ±0.6                          | 9.6 ±0.3                             | n.a.                                 |
| <b>N225S</b> | 4.6 ±0.2                             | 21.5 ±1.0                         | 3.4 ±0.04                            | n.a.                                 |
| <b>N226R</b> | 4.1 ±0.1                             | 7.9 ±0.2                          | 0.8 ±0.1                             | n.a.                                 |
| <b>R274S</b> | 2.2 ±0.1                             | 13.8 ±0.3                         | 1.8 ±0.1                             | n.a.                                 |

Specific activity (U mg<sup>-1</sup>) using the referred chitosan as substrates. Reactions were performed in triplicate and standard errors are indicated; n.d.. no determined; n.a.. no activity detected; DD. Deacetylation Degree.

**TABLE S3.** Peak areas of the NAG series detected by MS in reaction mediated by the Chit33 variants and NAG6

**Wt**

| m/z        | Peak area  |            |            |            |            |
|------------|------------|------------|------------|------------|------------|
|            | 0h         | 1h         | 2h         | 3h         | 4h         |
| 447.169894 | n.d.       | 522.872209 | 1359.00907 | 361.415596 | 703.847088 |
| 650.249034 | n.d.       | 195.136836 | 782.992968 | 179.208595 | 274.885643 |
| 853.300374 | 7.06934849 | 1590.46216 | 5149.23702 | 880.612962 | 972.332333 |
| 1056.35708 | 26.6680583 | 18.0583894 | 46.026739  | 12.9098203 | 20.1980323 |
| 1259.38343 | 3273.49823 | 11.9109029 | 40.7508395 | 6.28328536 | 11.0673346 |
| 1462.41891 | 145.546507 | 16.7617562 | 44.5422867 | 14.8613305 | 11.4190856 |

**S37D**

| m/z        | Peak area   |            |             |             |            |
|------------|-------------|------------|-------------|-------------|------------|
|            | 0h          | 1h         | 2h          | 3h          | 4h         |
| 447.192316 | n.d.        | 362.734166 | 1250.811333 | 305.2678083 | 257.662283 |
| 650.281472 | n.d.        | 409.926336 | 1272.962799 | 307.7697653 | 333.30445  |
| 853.345294 | 64.43226753 | 1840.40012 | 584.8224769 | 1035.864024 | 1056.01211 |
| 1056.40259 | 71.54345845 | 138.148386 | 49.32729074 | 24.75259189 | 31.7873075 |
| 1259.45843 | 6264.110586 | 37.6724238 | 54.30709408 | 21.09789333 | 22.8453215 |
| 1462.50303 | 355.053145  | 41.152849  | 13.49450185 | 20.06447915 | 24.0221646 |

**D117W**

| m/z        | Peak area   |            |            |            |            |
|------------|-------------|------------|------------|------------|------------|
|            | 0h          | 1h         | 2h         | 3h         | 4h         |
| 447.20048  | n.d.        | 464.531303 | 918.916208 | 254.160192 | 212.765565 |
| 650.287627 | n.d.        | 117.105589 | 538.801529 | 161.95989  | 143.465423 |
| 853.362565 | 64.43226753 | 916.299241 | 1929.92123 | 1822.93609 | 1530.47401 |
| 1056.37912 | 7.54345845  | 17.6936387 | 47.7296729 | 30.3694751 | 23.8170379 |
| 1259.47589 | 6264.110586 | 17.59809   | 31.0332072 | 27.8820061 | 12.8861343 |
| 1462.5402  | 355.053145  | 14.5567186 | 29.9265201 | 58.8780017 | 39.9026678 |

**S188Y**

| m/z        | Peak area  |             |            |            |            |
|------------|------------|-------------|------------|------------|------------|
|            | 0h         | 1h          | 2h         | 3h         | 4h         |
| 447.20048  | n.d.       | 334.4162376 | 770.41187  | 625.765907 | 262.33374  |
| 650.287627 | n.d.       | 364.3165198 | 3239.00524 | 523.576211 | 23.0860787 |
| 853.362565 | 7.06934849 | 3753.398245 | 3955.31727 | 3073.93893 | 44.2168977 |
| 1056.37912 | 26.6680583 | 65.1840015  | 243.752879 | 33.0368787 | 103.037357 |
| 1259.47589 | 3273.49823 | 261.1205172 | 228.899595 | 86.0634975 | 6836.40056 |
| 1462.5402  | 145.546507 | 178.2737261 | 122.749984 | 39.6683242 | 295.949741 |

**N225S**

|            | Peak area  |            |            |            |
|------------|------------|------------|------------|------------|
| m/z        | 0h         | 1h         | 3h         | 4h         |
| 447.170196 | 9.33917182 | 23.7897087 | 141.295411 | 343.420901 |
| 650.266862 | 7.50137177 | 18.9234566 | 51.3080831 | 133.338918 |
| 853.325272 | 19.6915993 | 116.448142 | 953.070876 | 4533.06521 |
| 1056.36587 | 24.8783619 | 37.5698863 | 61.7707671 | 236.734565 |
| 1259.42283 | 2667.76251 | 3872.86533 | 3502.52733 | 703.899828 |
| 1462.47677 | 143.608013 | 218.790456 | 187.649081 | 470.96124  |
| 1665.50949 | 5.61644704 | 12.4031181 | 18.6988078 | 32.3127751 |

**N226R**

|            | Peak area  |            |            |            |
|------------|------------|------------|------------|------------|
| m/z        | 0h         | 1h         | 3h         | 4h         |
| 447.178451 | 9.33917182 | 660.155336 | 852.508175 | 483.689469 |
| 650.265609 | 7.50137177 | 330.104718 | 279.539936 | 318.400036 |
| 853.322462 | 19.6915993 | 7823.4396  | 4201.52711 | 5338.41851 |
| 1056.37306 | 24.8783619 | 167.400299 | 46.0913735 | 150.238644 |
| 1259.41735 | 2667.76251 | 247.68366  | 44.1802842 | 128.912331 |
| 1462.46197 | 143.608013 | 315.096422 | 50.8607334 | 174.197163 |
| 1665.50184 | 5.61644704 | 23.6120261 | n.d.       | 15.1370528 |

**R274S**

|            | Peak area  |            |            |
|------------|------------|------------|------------|
| m/z        | 0h         | 2h         | 4h         |
| 447.170196 | 9.33917182 | 108.242097 | 255.397213 |
| 650.266862 | 7.50137177 | 31.1653827 | 56.5724428 |
| 853.325272 | 19.6915993 | 1989.85551 | 4256.61505 |
| 1056.36587 | 24.8783619 | 43.4389663 | 87.3775622 |
| 1259.42283 | 2667.76251 | 64.6398262 | 108.63619  |
| 1462.47677 | 143.608013 | 101.369156 | 153.498171 |
| 1665.50949 | 5.61644704 | 13.8739912 | 6.00257681 |

Only  $[M+Na]^+$  peaks corresponding to the NAG series detected in the reactions with the referred variants are indicated; m/z of 447.170196, 650.265609, 853.325272, 1056.36587, 1259.42283 and 1462.47677 for NAG2, NAG3, NAG4, NAG5, NAG6, NAG7; n.d., no detected.

**TABLE S4.** Peak areas of the NAG series detected by MS in reaction mediated by the Chit33 variants and NAG6 after 24h reactions

| m/z        | COS  | Peak area  |            |            |            |            |            |            |
|------------|------|------------|------------|------------|------------|------------|------------|------------|
|            |      | Wt         | S37D       | D117W      | S118Y      | Q199S      | N225S      | N226R      |
| 447,189996 | NAG2 | 1297.7684  | 1250.81133 | 918.916208 | 564.434407 | 852.508175 | 622.261403 | 3225.28022 |
| 650,272402 | NAG3 | 1228.20004 | 1272.9628  | 538.801529 | 766.824092 | 279.539936 | 274.841567 | 2124.57075 |
| 853,343227 | NAG4 | 242.312725 | 584.822477 | 1929.92123 | 3178.36173 | 4201.52711 | 2005.13701 | 4195.44749 |
| 1056,39781 | NAG5 | 62.6923724 | 49.3272907 | 47.7296729 | 87.1408261 | 46.0913735 | 48.5593615 | 117.185437 |
| 1259,45199 | NAG6 | 35.3337893 | 54.3070941 | 31.0332072 | 96.4479803 | 44.1802842 | 210.03166  | 83.7368256 |
| 1462,51017 | NAG7 | 27.1913441 | 33.3051667 | 29.9265201 | 84.3497867 | 50.8607334 | 57.8035547 | 81.7964712 |

Only [M+Na]<sup>+</sup> + peaks corresponding to the NAG series detected in the reactions with the referred variants are indicated

**TABLE S5.** Primers used for site-directed mutagenesis.

| Oligonucleotide | Mer | Sequence                                               |
|-----------------|-----|--------------------------------------------------------|
| S37D(+)         | 30  | GGTCAGAAC <b>GAT</b> GCCAACTCGCAAAGCACC                |
| S37D(-)         | 30  | CGAGTTGGC <b>ATC</b> GTTCTGACCCAGTATAC                 |
| D117W(+)        | 30  | TCTCGGCGGCT <b>TGG</b> TCTTACACTCAGGGCGG               |
| D117W(-)        | 30  | GAGTGTAAGAC <b>CCAG</b> CCGCCGAGAGAAAGGA               |
| S118Y(+)        | 27  | CGGCGGCGATT <b>ACT</b> ACACTCAGGGCGG                   |
| S118Y(-)        | 27  | CTGAGTGTA <b>GTAA</b> TCGCCCGAGAGA                     |
| D165AE167A(+)   | 36  | TTCGACTTC <b>GCT</b> TTT <b>GCT</b> GCTACCACCAACAACCTC |
| D165AE167A(-)   | 42  | GGTAGC <b>AGCAAAAG</b> CGAAGTCGAAGCCATCGACGACGGCACT    |
| Q199S(+)        | 31  | CTGCTGCTCCC <b>TCT</b> TGCTTCTCCCGACGC                 |
| Q199S(-)        | 30  | GGAAGAAGCA <b>AGAG</b> GGGAGCAGCAGAGAAGT               |
| N225S(+)        | 32  | TCAGTTCTACT <b>TCTA</b> ACCCCTGTGGCGTCAGCG             |
| N225S(-)        | 32  | CACAGGGGT <b>TAGAG</b> TAGAACTGAATCTGGATC              |
| N226R(+)        | 33  | CAGTTCTACAA <b>CTCT</b> CCCTGTGGCGTCAGCGGC             |
| N226R(-)        | 36  | CTGACGCC <b>ACAG</b> GGGAGAGTTGTAGAACTGAATCTGG         |
| R274S(+)        | 26  | AGGTGCTGGT <b>TCT</b> GGCTACGTCTCTG                    |
| R274S(-)        | 29  | GACGTAGCC <b>AGA</b> ACCAGCACCTGGGCCAG                 |

Substitutions made are in bold

**A1**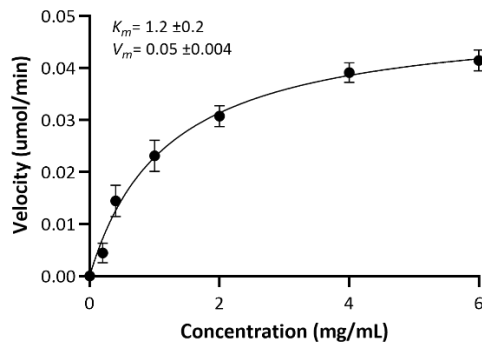**A2**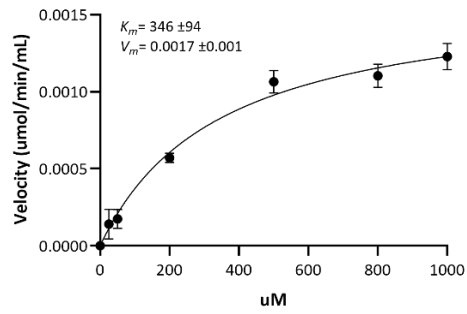**B1**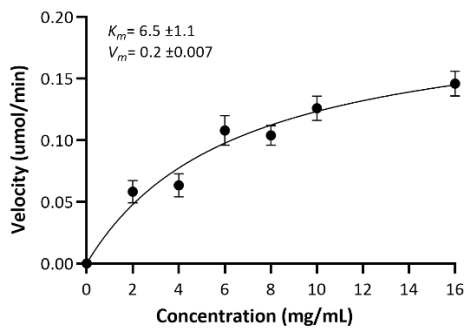**B2**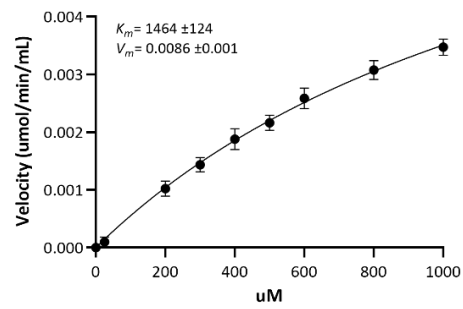**C1**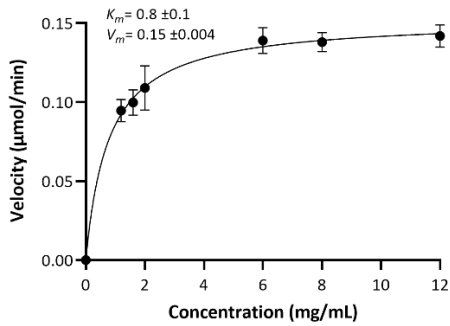**C2**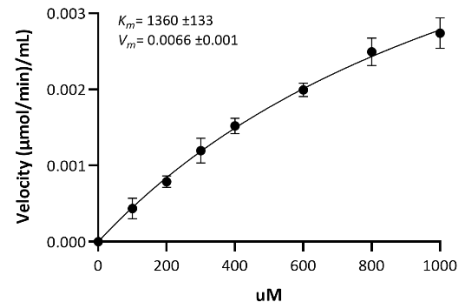**D1**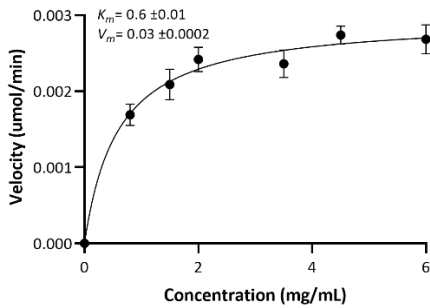**D2**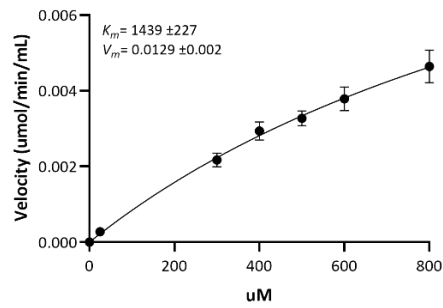

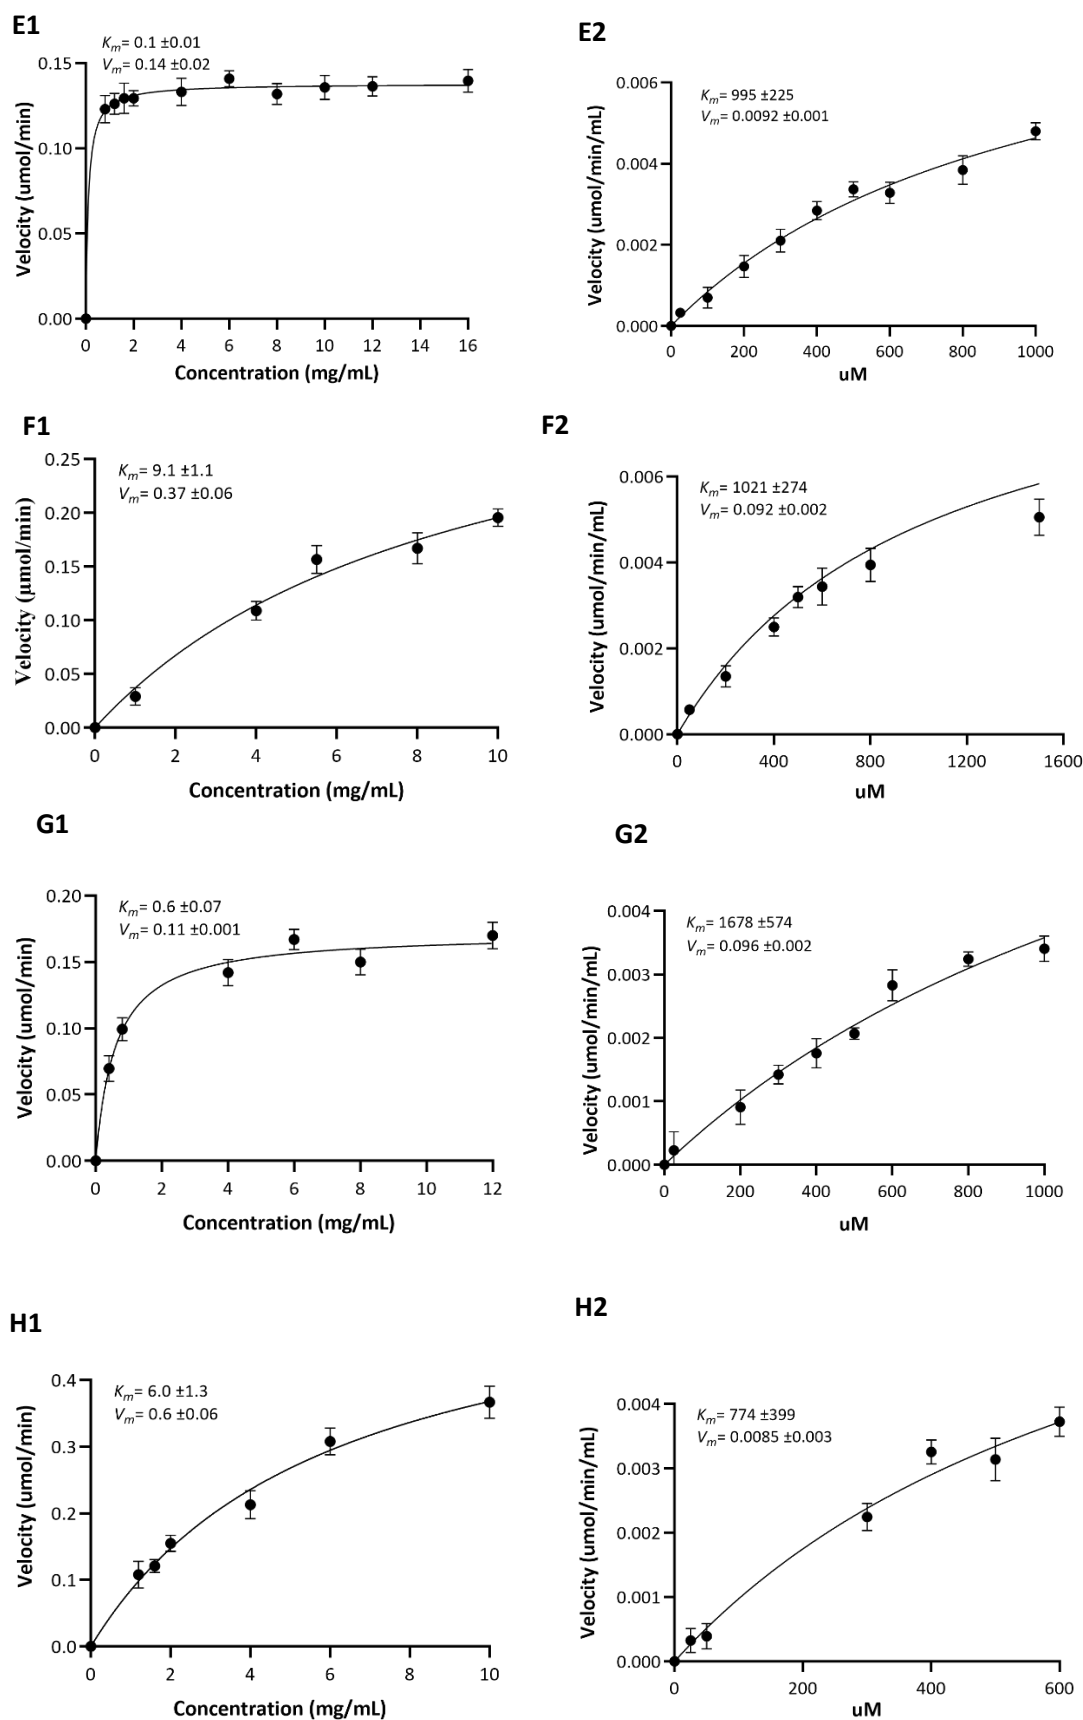

**Figure S1.** Michaelis-Menten kinetics for the Chit33 variants on colloidal chitin and NAG6. Colloidal chitin (1, left) and NAG6 (2, right). A, wt; B, S37D; C, D117W; D, S118Y; E, Q199S; F, N225S; G, N226R; H, R274S.  $V_{max}$  and  $K_m$  values (from GraphPad Prism software version 8.0) are also shown. All reactions were performed in triplicate and the kinetic parameters were calculated fitting



the initial rate values to the Michaelis-Menten equation. Standard errors were obtained by fitting the normalized equation as  $v = (k_{cat}/K_m) [S]/(1 + [S]/K_m)$ .
